# Supplementary material
Source: PubMed Central journal article supplement (PMC2084297)
Supplement: pnas_0705814104_1.pdf [file pnas_0705814104_1.pdf]

**A**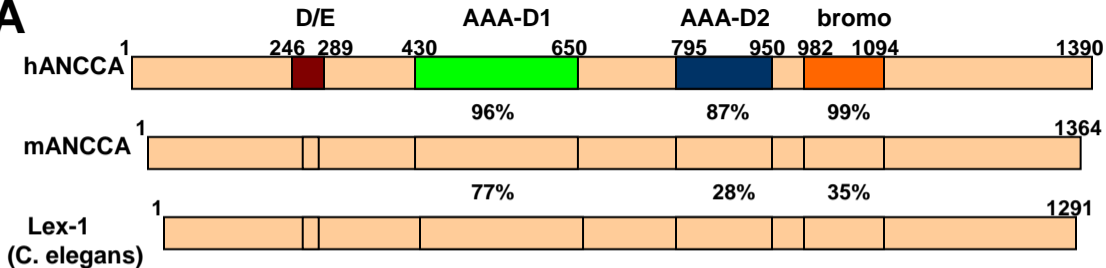**B**Walker A

ANCCA: 462 GCLFYGGPGTGKTLVARALANECSQGDKRVAFFMRK**GADCLSKWV**GESERQLRLLFDQAYQMR  
 P97/VCP 240 G I LLYGPPGTGKTL IARAVANETG-----AFFFL INGPE **IMSK L AGESESNLRKAFEEAEKNA**

Walker B

ANCCA 525 **PS I I FFDEIDGLAPVRSSRQDQ I HSS IVSTLLALMDGLDSRGEI VV IGATNRLDSI DP**  
 P97/VCP298 **PA I I FI DEIDAI AP KREKTHGEVERR IVSQLLTLMDGLKQRAHVI VMAATNRPN**SI DP****

Sensor IARG-finger

ANCCA 583 **ALRRPGRFDREFLFSLPDKEARKE I LK I HTRDWNPKPLDTFLEELAENCVGYCGAD I** 639  
 P97/VCP356 **ALRRFGRFDREVD IGI PDATGRLEI LQ I HTKNMKL--ADDVDLEQVANETHGHV**GADL**** 411

Sensor II
