# Supplementary material
Source: PubMed Central journal article supplement (PMC2084297)

**A**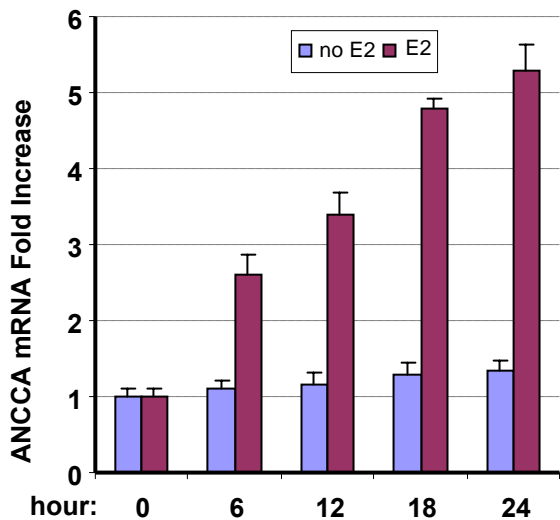**B** $\alpha$ -ANCCA

DAPI

MERGE

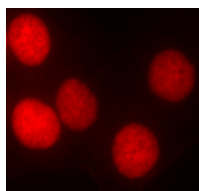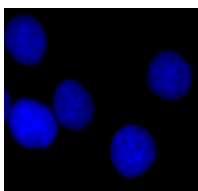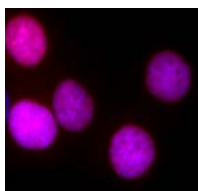**C**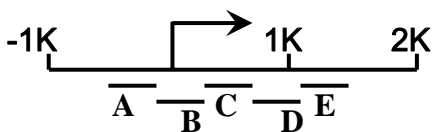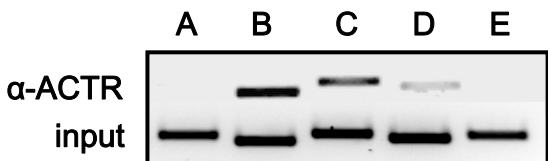

Supplement: pnas_0705814104_2.pdf [file pnas_0705814104_2.pdf]

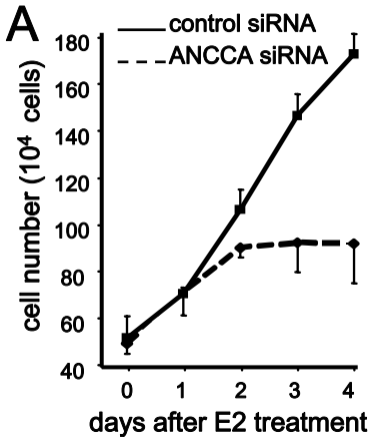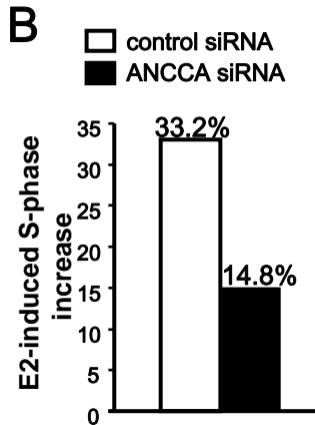

Supplement: pnas_0705814104_3.pdf [file pnas_0705814104_3.pdf]
